# Supplementary material
Source: PubMed Central journal article supplement (PMC3915509)
Supplement: NIHMS549949-supplement-1.pdf [file NIHMS549949-supplement-1.pdf]

## Stankiewicz and Crispino

### Supplementary Figure Legends

**Supplementary Figure 1:** (A) Representative flow cytometry plot for CD41 expression versus CD42 expression for GFP, mcherry, double positive wild-type fetal liver derived hematopoietic progenitors of the indicated sample type N=5; average  $\pm$  SEM shown. (B) Representative flow cytometry plot for CD41 expression versus CD42 expression for *Gata1s* knock-in fetal liver derived hematopoietic progenitors of the indicated sample type N=3, average $\pm$ SEM shown.

**Supplementary Figure 2:** (A) Percentage of Annexin V positive cells for the indicated sample population assessed weekly by flow cytometry for sorted GFP positive, mcherry positive wild-type fetal liver hematopoietic progenitors N=4 average  $\pm$  SEM shown. P-values  $\leq$  0.04 for myrAKT in comparison to all other samples (Migr1, ERG and myrAKT+ERG) at 2 and 3 weeks. ERG has best overall survival with p-value  $\leq$  0.03 compared to Migr1 over time course. (C) Representative histogram profile of Annexin V positivity for samples as in (A) with bar indicating value (percentage of population) positive for Annexin V for myrAKT and companion histograms for the other samples at 3 weeks. (B) Percentage of Annexin V positive cells for the indicated sample population assessed weekly by flow cytometry for sorted GFP positive, mcherry positive *Gata1s* knock-in fetal liver hematopoietic progenitors N=3; p-values  $\leq$  0.03 for myrAKT and

myrAKT+ERG in comparison to both Migr1 and ERG at weeks 2 and 4. ERG has best overall survival by week 4 with p-value  $\leq 0.001$  compared to Migr1; no significant difference between myrAKT and myrAKT+ERG at week 2 or 4. (D) Representative histogram profile of Annexin V staining for *Gata1s* knock-in samples as in B with bar indicating value (percentage of population) for myrAKT+ERG and companion histograms for the other three samples at week 4.

**Supplementary Figure 3:** (A); Average fold change for each increasing dose of MK-2206 (1  $\mu$ M, 5  $\mu$ M, and 10  $\mu$ M) compared to DMSO control for both Annexin V positive cells (apoptotic) and necrotic cells (7AAD singly positive staining cells) N=3; p-value  $\leq 0.04$  for all CMK, CMS and CHRF values shown compared to DMSO; p-value  $\leq 0.04$  for all 5 mM and 10 mM CMY values shown compared to DMSO; (B) Table of cytarabine (Ara-C) and MK-2206 combinations used for assessment of synergy in the CMK and CHRF cell lines with accompanying combination index (CI) values. (C) CI sample graphs as determined by CompuSyn software. N=3 for all samples of drug combinations and negative controls during assessment of proliferation via cell count enumeration with trypan blue exclusion. CI values  $< 1$  generally defined as synergistic, equal to 1 considered additive and  $> 1$  are considered antagonistic.

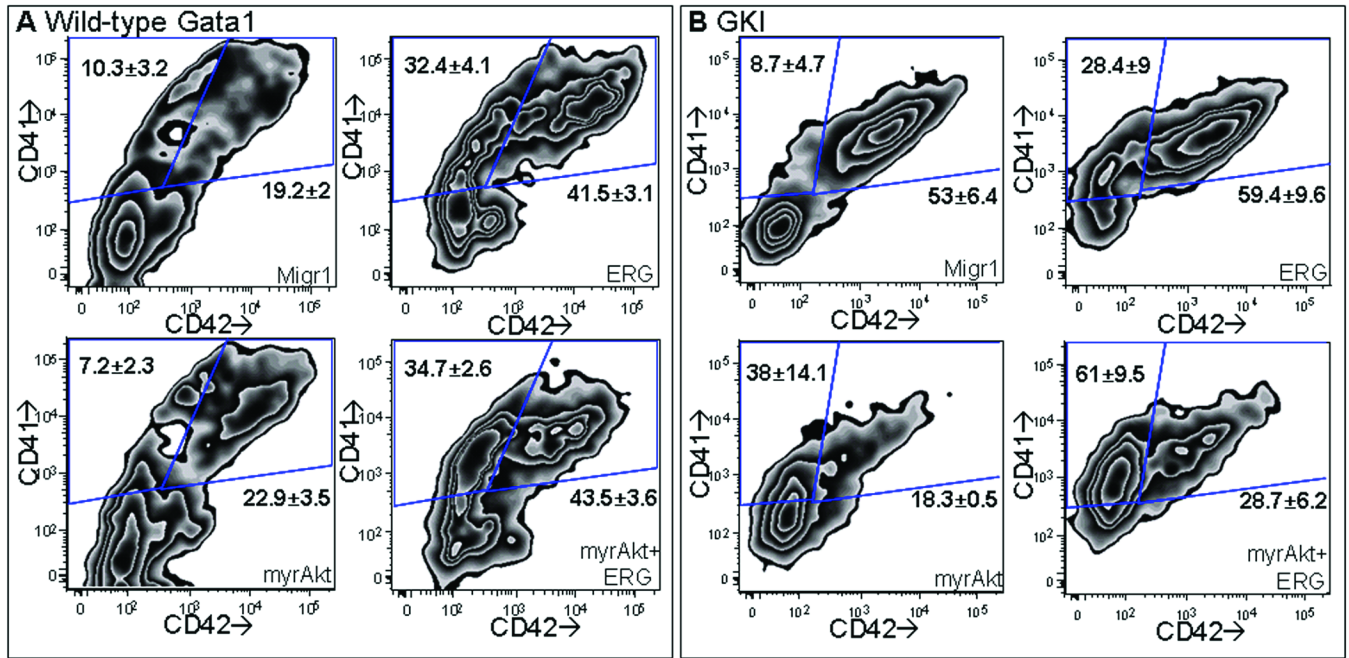

Supplementary Figure 1

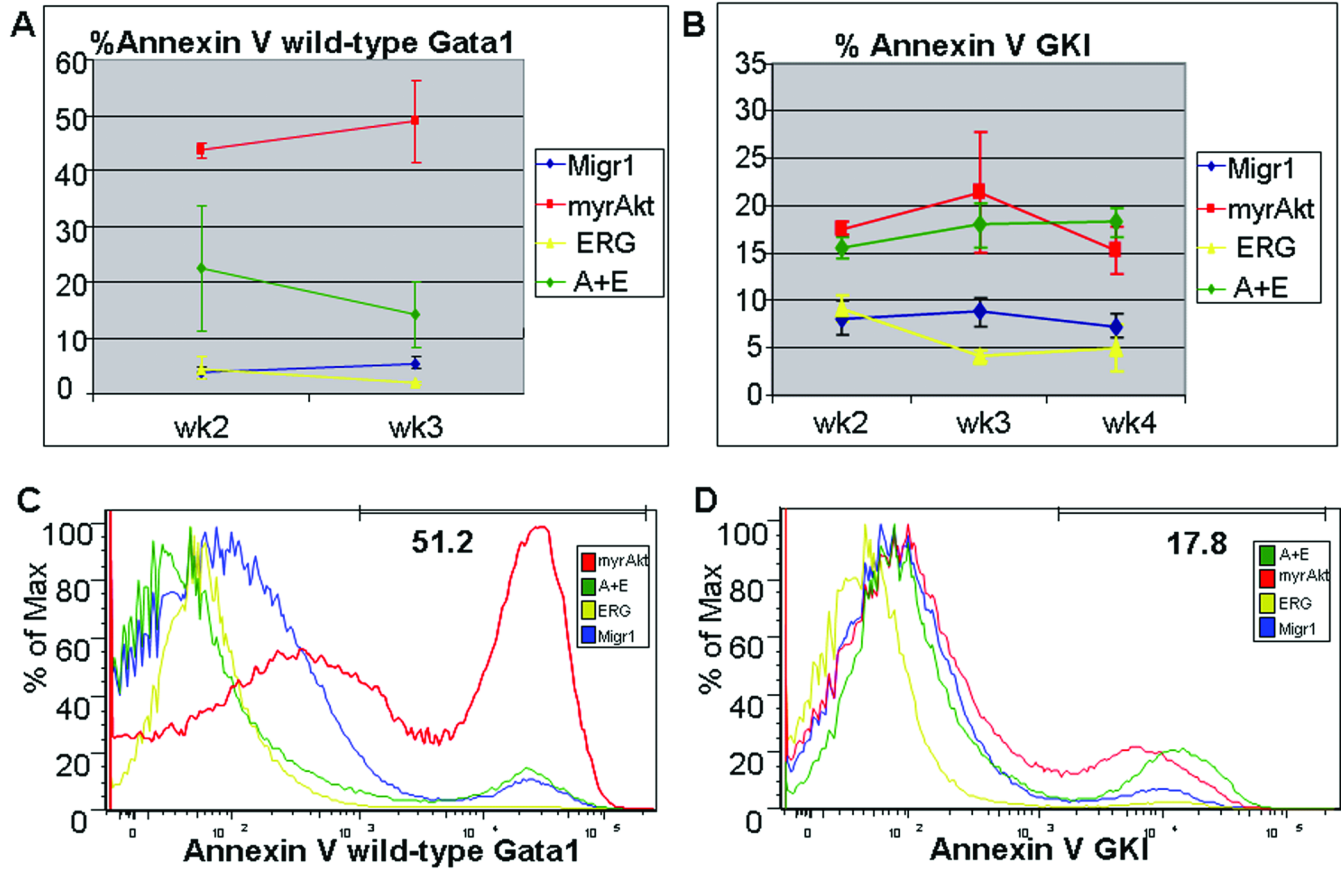

Supplementary Figure 2

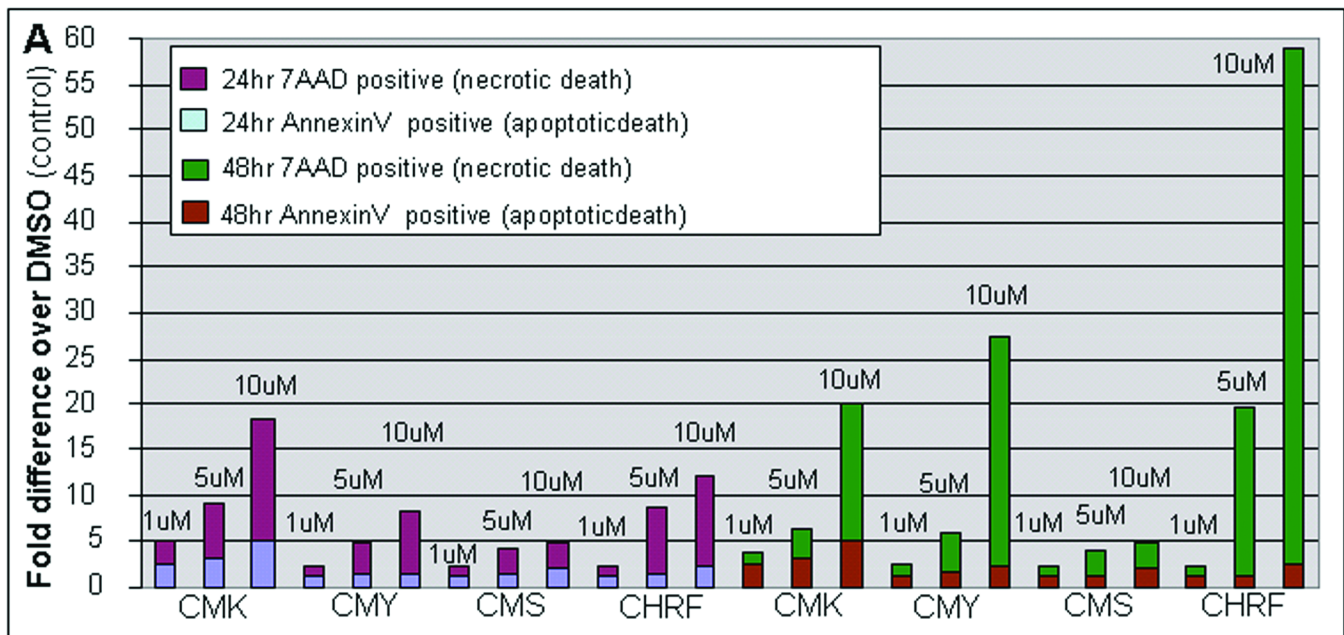

**B**

| CMK      |            |              | CHRf     |            |              |
|----------|------------|--------------|----------|------------|--------------|
| Ara-C nM | MK-2206 nM | CI           | Ara-C nM | MK-2206 nM | CI           |
| 0        | 0          | 127.652      | 0        | 0          | 229.723      |
| 25       | 1000       | 13.35        | 10       | 1000       | 2.051        |
| 50       | 5000       | 6.345        | 25       | 2500       | 1.346        |
| 100      | 10000      | <b>0.777</b> | 50       | 5000       | <b>0.911</b> |
| 200      | 20000      | <b>0.004</b> | 75       | 7500       | <b>0.286</b> |
|          |            |              | 100      | 10000      | <b>0.02</b>  |

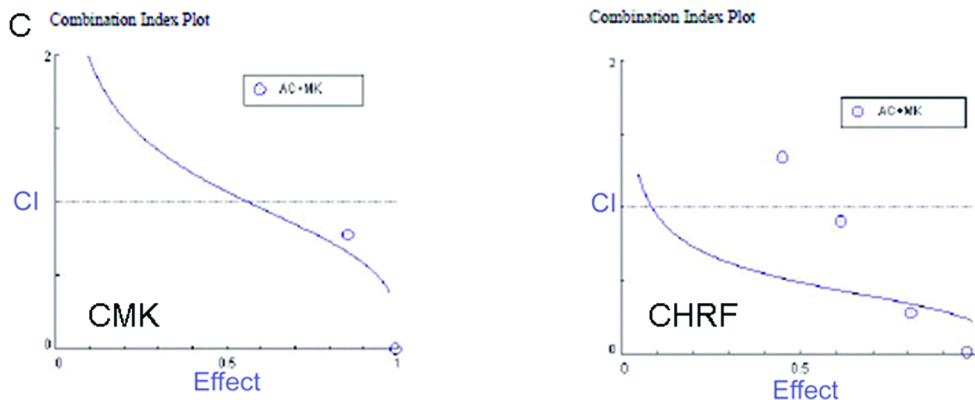

AC+MK = cytarabine (Ara-C) + MK-2206  
 CI-Combination Index  
 Effect- fraction affected shown (1=100% of population)

Supplementary Figure 3
